# Supplementary material for: Detrusor Myocyte Autophagy Protects the Bladder Function via Inhibiting the Inflammation in Cyclophosphamide-Induced Cystitis in Rats
Source: PLoS One. 2015 Apr 1;10(4):e0122597. doi: 10.1371/journal.pone.0122597 (PMC4382282; doi:10.1371/journal.pone.0122597)
Supplement: S6 Dataset — (XLS) [file pone.0122597.s006.xls]

## Sheet: Sheet1
Group(CYP)	inflammation grading				CYP+RAPA	inflammation grading			CYP+CQ	inflammation grading
control	0				control	1			control	1
control	1				control	1			control	0
control	1				control	0			control	1
control	0				control	0			control	1
control	1				control	1			control	1
control	0				control	1			control	1
control	1				control	0			control	0
4h	5				4h	3			4h	5
4h	4				4h	4			4h	5
4h	4				4h	2			4h	4
4h	4				4h	4			4h	4
4h	5				4h	4			4h	5
4h	5				4h	2			4h	5
4h	5				4h	3			4h	5
48h	3				48h	2			48h	5
48h	4				48h	2			48h	5
48h	5				48h	2			48h	5
48h	4				48h	3			48h	5
48h	4				48h	1			48h	5
48h	3				48h	2			48h	5
48h	3				48h	3			48h	4
72h	3				72h	2			72h	5
72h	3				72h	1			72h	4
72h	4				72h	1			72h	5
72h	5				72h	1			72h	5
72h	4				72h	1			72h	5
72h	3				72h	2			72h	5
72h	3				72h	2			72h	5
